# Supplementary material
Source: publisher figshare collection journal article supplement (https://plos.figshare.com/articles/dataset/_/117358)
Supplement: Supplementary file [file 1]

Table S2. List of assets and factor scores used for the analysis

| Asset Variable                              | asset factor score | Mean  | Std. Dev. | has asset | Does not have asset |
|---------------------------------------------|--------------------|-------|-----------|-----------|---------------------|
| Has car                                     | 0.048              | 0.003 | 0.056     | 0.860     | -0.003              |
| Has fridgerator                             | 0.063              | 0.002 | 0.046     | 1.354     | -0.003              |
| Has television                              | 0.111              | 0.073 | 0.260     | 0.397     | -0.031              |
| Has stereo set                              | 0.038              | 0.017 | 0.128     | 0.290     | -0.005              |
| Has ironbox                                 | 0.044              | 0.220 | 0.415     | 0.083     | -0.024              |
| Has cellular phone                          | 0.150              | 0.400 | 0.490     | 0.184     | -0.123              |
| Has motorcycle                              | 0.075              | 0.020 | 0.140     | 0.527     | -0.011              |
| Has fan                                     | 0.028              | 0.007 | 0.083     | 0.331     | -0.002              |
| Has radio                                   | 0.073              | 0.771 | 0.420     | 0.040     | -0.133              |
| Has bicycle                                 | -0.023             | 0.282 | 0.450     | -0.036    | 0.014               |
| Has sofa                                    | 0.024              | 0.672 | 0.469     | 0.017     | -0.035              |
| Has table                                   | -0.037             | 0.937 | 0.242     | -0.010    | 0.145               |
| Has electricity                             | 0.125              | 0.015 | 0.120     | 1.024     | -0.015              |
| Has bed                                     | -0.037             | 0.945 | 0.228     | -0.009    | 0.152               |
| Has livestock                               | -0.174             | 0.387 | 0.487     | -0.219    | 0.138               |
| Has poultry                                 | -0.228             | 0.635 | 0.481     | -0.173    | 0.301               |
| Has sewing machine                          | 0.016              | 0.015 | 0.123     | 0.126     | -0.002              |
| Has gas                                     | 0.197              | 0.047 | 0.211     | 0.888     | -0.044              |
| If has rudimentary walls                    | -0.300             | 0.609 | 0.488     | -0.241    | 0.375               |
| If has earth as principal floor in dwelling | -0.320             | 0.673 | 0.469     | -0.223    | 0.459               |
| If has natural material roofing             | -0.129             | 0.118 | 0.323     | -0.352    | 0.047               |
| If uses a lantern for lighting              | 0.133              | 0.345 | 0.475     | 0.184     | -0.097              |
| If uses electricity for lighting            | 0.144              | 0.015 | 0.122     | 1.157     | -0.018              |
| If uses tin lamp for lighting               | -0.169             | 0.604 | 0.489     | -0.137    | 0.208               |
| If uses other for lighting                  | 0.006              | 0.029 | 0.168     | 0.036     | -0.001              |
| If uses charcoal for cooking heat           | 0.358              | 0.190 | 0.392     | 0.739     | -0.174              |
| If uses firewood for cooking heat           | -0.364             | 0.783 | 0.412     | -0.191    | 0.691               |
| If uses other for cooking heat              | 0.049              | 0.020 | 0.140     | 0.341     | -0.007              |
| If household own land                       | -0.346             | 0.718 | 0.450     | -0.217    | 0.552               |
| If household lease land                     | 0.334              | 0.219 | 0.413     | 0.632     | -0.177              |
| If household land is other category         | 0.068              | 0.057 | 0.231     | 0.278     | -0.017              |
| Survey period I                             | 0.018              | 0.331 | 0.471     | 0.025     | -0.012              |
| Survey period II                            | 0.001              | 0.225 | 0.417     | 0.001     | 0.000               |
| Survey period III                           | -0.007             | 0.222 | 0.415     | -0.012    | 0.003               |
| Survey period IV                            | -0.014             | 0.222 | 0.416     | -0.027    | 0.008               |
| If toilet is flush one                      | 0.012              | 0.000 | 0.015     | 0.840     | 0.000               |
| If toilet is pit latrine                    | 0.152              | 0.138 | 0.345     | 0.380     | -0.061              |
| If toilet is ventilated pit latrine         | 0.064              | 0.004 | 0.064     | 1.001     | -0.004              |
