# Supplementary material
Source: publisher figshare collection journal article supplement (https://plos.figshare.com/articles/dataset/_/117358)
Supplement: Supplementary file [file 1]

Table S1. Quartile values for LLIN and young population densities from a 100-meter radius model to a 3000-meter radius model

1) LLIN densities in a circle around a child; number of LLIN per square kilometer (km<sup>2</sup>)

| Data set                                                                                                          | Percentile | Radius from a child (meters) |       |      |      |      |      |      |      |      |      |      |      |      |      |      |      |      |      |      |      |      |      |      |      |      |      |      |      |      |      |
|-------------------------------------------------------------------------------------------------------------------|------------|------------------------------|-------|------|------|------|------|------|------|------|------|------|------|------|------|------|------|------|------|------|------|------|------|------|------|------|------|------|------|------|------|
|                                                                                                                   |            | 100                          | 200   | 300  | 400  | 500  | 600  | 700  | 800  | 900  | 1000 | 1100 | 1200 | 1300 | 1400 | 1500 | 1600 | 1700 | 1800 | 1900 | 2000 | 2100 | 2200 | 2300 | 2400 | 2500 | 2600 | 2700 | 2800 | 2900 | 3000 |
| For children sleeping without a bed net (A) in Figure 3                                                           | 25%        | 0.0                          | 15.9  | 14.1 | 11.9 | 11.5 | 11.5 | 10.4 | 10.4 | 10.2 | 9.9  | 9.7  | 9.3  | 9.0  | 8.4  | 8.5  | 8.3  | 8.3  | 8.2  | 7.9  | 7.7  | 7.6  | 7.6  | 7.5  | 7.3  | 7.1  | 6.9  | 6.7  | 6.6  | 6.4  | 6.3  |
|                                                                                                                   | 50%        | 63.7                         | 39.8  | 31.8 | 29.8 | 28.0 | 26.5 | 25.3 | 22.9 | 21.6 | 20.4 | 19.2 | 18.1 | 17.3 | 16.6 | 16.0 | 15.4 | 15.3 | 15.0 | 14.9 | 14.5 | 14.2 | 13.9 | 13.8 | 13.6 | 13.3 | 13.1 | 13.1 | 13.1 | 13.1 | 13.2 |
|                                                                                                                   | 75%        | 159.2                        | 103.5 | 77.8 | 67.6 | 57.3 | 50.4 | 46.8 | 43.8 | 41.3 | 39.5 | 38.7 | 37.8 | 36.4 | 35.1 | 33.4 | 32.2 | 30.7 | 30.2 | 30.2 | 29.5 | 29.2 | 28.6 | 27.9 | 27.5 | 27.7 | 27.2 | 26.6 | 25.9 | 25.6 | 25.4 |
| For children sleeping without a bed net who lived far from health facilities (B) in Figure 3                      | 25%        | 0.0                          | 8.0   | 7.1  | 8.0  | 7.6  | 7.1  | 7.1  | 7.0  | 7.1  | 6.7  | 6.6  | 6.6  | 6.6  | 6.5  | 6.2  | 6.2  | 6.2  | 6.1  | 6.2  | 6.2  | 6.3  | 6.0  | 6.1  | 6.1  | 6.1  | 6.0  | 5.9  | 5.8  | 5.6  | 5.4  |
|                                                                                                                   | 50%        | 31.8                         | 23.9  | 21.2 | 19.9 | 17.8 | 16.8 | 16.2 | 15.4 | 14.5 | 14.0 | 13.4 | 12.8 | 12.4 | 12.2 | 11.9 | 11.6 | 11.3 | 11.1 | 10.9 | 10.7 | 10.5 | 10.2 | 10.1 | 9.9  | 9.8  | 9.9  | 9.9  | 9.9  | 9.8  | 9.8  |
|                                                                                                                   | 75%        | 95.5                         | 55.7  | 42.4 | 37.8 | 33.1 | 30.9 | 28.6 | 26.4 | 24.8 | 23.6 | 22.4 | 21.2 | 20.5 | 20.0 | 19.4 | 18.8 | 18.4 | 17.9 | 17.6 | 17.3 | 16.9 | 16.7 | 16.4 | 16.2 | 15.9 | 15.8 | 15.7 | 15.6 | 15.4 | 15.2 |
| For trand analysis among children sleeping without a bed net who lived far from health facilities (A) in Figure 4 | 25%        | 0.0                          | 8.0   | 7.1  | 8.0  | 7.6  | 7.1  | 7.1  | 7.0  | 7.1  | 6.7  | 6.6  | 6.6  | 6.6  | 6.5  | 6.2  | 6.2  | 6.2  | 6.1  | 6.2  | 6.2  | 6.3  | 6.0  | 6.1  | 6.1  | 6.1  | 6.0  | 5.9  | 5.8  | 5.6  | 5.4  |
|                                                                                                                   | 50%        | 31.8                         | 23.9  | 21.2 | 19.9 | 17.8 | 16.8 | 16.2 | 15.4 | 14.5 | 14.0 | 13.4 | 12.8 | 12.4 | 12.2 | 11.9 | 11.6 | 11.3 | 11.1 | 10.9 | 10.7 | 10.5 | 10.2 | 10.1 | 9.9  | 9.8  | 9.9  | 9.9  | 9.9  | 9.8  | 9.8  |
|                                                                                                                   | 75%        | 95.5                         | 55.7  | 42.4 | 37.8 | 33.1 | 30.9 | 28.6 | 26.4 | 24.8 | 23.6 | 22.4 | 21.2 | 20.5 | 20.0 | 19.4 | 18.8 | 18.4 | 17.9 | 17.6 | 17.3 | 16.9 | 16.7 | 16.4 | 16.2 | 15.9 | 15.8 | 15.7 | 15.6 | 15.4 | 15.2 |

\* Gray collored cells are values in the best fit model among the 30 Cox PH models from 100-meter to 3000-meter radius models.

2) Population densities of young people between five years old and 20 years old in a circle around a child; number of young poeple per square kilometer (km<sup>2</sup>)

| Data set                                                                                                         | Percentile | Radius from a child (meters) |       |       |       |       |       |       |       |       |       |       |       |       |       |       |       |       |       |       |       |       |       |       |       |       |       |       |      |      |      |
|------------------------------------------------------------------------------------------------------------------|------------|------------------------------|-------|-------|-------|-------|-------|-------|-------|-------|-------|-------|-------|-------|-------|-------|-------|-------|-------|-------|-------|-------|-------|-------|-------|-------|-------|-------|------|------|------|
|                                                                                                                  |            | 100                          | 200   | 300   | 400   | 500   | 600   | 700   | 800   | 900   | 1000  | 1100  | 1200  | 1300  | 1400  | 1500  | 1600  | 1700  | 1800  | 1900  | 2000  | 2100  | 2200  | 2300  | 2400  | 2500  | 2600  | 2700  | 2800 | 2900 | 3000 |
| For children sleeping without a bed net (A) in Figure 5                                                          | 25%        | 191.0                        | 143.2 | 123.8 | 115.4 | 108.2 | 102.6 | 98.1  | 92.5  | 88.0  | 83.4  | 78.9  | 74.5  | 71.8  | 68.9  | 66.5  | 64.5  | 63.1  | 61.7  | 60.0  | 58.6  | 57.4  | 56.0  | 54.6  | 53.5  | 52.5  | 51.3  | 50.0  | 49.1 | 48.2 | 47.5 |
|                                                                                                                  | 50%        | 350.1                        | 246.7 | 208.7 | 181.0 | 163.0 | 149.4 | 137.1 | 126.8 | 118.7 | 113.0 | 107.3 | 103.2 | 98.9  | 94.8  | 91.0  | 88.2  | 85.6  | 83.1  | 80.7  | 78.1  | 75.9  | 73.9  | 71.8  | 70.3  | 68.9  | 67.4  | 65.9  | 64.6 | 63.6 | 62.5 |
|                                                                                                                  | 75%        | 732.1                        | 461.5 | 367.8 | 312.3 | 269.9 | 246.7 | 228.7 | 207.4 | 189.4 | 179.5 | 168.9 | 161.8 | 155.4 | 149.9 | 145.1 | 139.1 | 134.2 | 129.9 | 124.5 | 119.3 | 116.8 | 113.4 | 111.7 | 109.5 | 107.4 | 104.5 | 102.0 | 99.9 | 98.8 | 98.4 |
| For children sleeping without a bed net who lived far from health facilities (B) in Figure 5                     | 25%        | 159.2                        | 119.4 | 102.6 | 95.5  | 90.4  | 87.5  | 84.4  | 80.1  | 76.2  | 72.3  | 69.4  | 66.1  | 62.7  | 60.6  | 58.0  | 56.2  | 55.0  | 53.5  | 52.3  | 51.2  | 50.2  | 49.3  | 49.0  | 48.3  | 47.4  | 46.1  | 45.2  | 44.1 | 42.9 | 41.8 |
|                                                                                                                  | 50%        | 286.5                        | 191.0 | 162.7 | 143.2 | 129.9 | 121.1 | 113.0 | 106.9 | 101.0 | 95.8  | 91.3  | 86.7  | 83.4  | 80.7  | 78.1  | 75.6  | 73.1  | 71.5  | 69.4  | 67.2  | 65.3  | 63.3  | 61.9  | 60.7  | 59.8  | 58.8  | 57.9  | 57.3 | 56.6 | 55.7 |
|                                                                                                                  | 75%        | 509.3                        | 294.4 | 244.0 | 206.9 | 180.8 | 164.5 | 148.8 | 136.8 | 126.5 | 119.7 | 114.2 | 109.0 | 104.2 | 100.4 | 97.2  | 95.4  | 93.0  | 91.3  | 88.6  | 85.4  | 82.6  | 80.4  | 78.6  | 76.6  | 74.6  | 73.2  | 71.7  | 70.7 | 69.8 | 69.0 |
| For tend analysis among children sleeping without a bed net who lived far from health facilities (A) in Figure 4 | 25%        | 159.2                        | 119.4 | 102.6 | 95.5  | 90.4  | 87.5  | 84.4  | 80.1  | 76.2  | 72.3  | 69.4  | 66.1  | 62.7  | 60.6  | 58.0  | 56.2  | 55.0  | 53.5  | 52.3  | 51.2  | 50.2  | 49.3  | 49.0  | 48.3  | 47.4  | 46.1  | 45.2  | 44.1 | 42.9 | 41.8 |
|                                                                                                                  | 50%        | 286.5                        | 191.0 | 162.7 | 143.2 | 129.9 | 121.1 | 113.0 | 106.9 | 101.0 | 95.8  | 91.3  | 86.7  | 83.4  | 80.7  | 78.1  | 75.6  | 73.1  | 71.5  | 69.4  | 67.2  | 65.3  | 63.3  | 61.9  | 60.7  | 59.8  | 58.8  | 57.9  | 57.3 | 56.6 | 55.7 |
|                                                                                                                  | 75%        | 509.3                        | 294.4 | 244.0 | 206.9 | 180.8 | 164.5 | 148.8 | 136.8 | 126.5 | 119.7 | 114.2 | 109.0 | 104.2 | 100.4 | 97.2  | 95.4  | 93.0  | 91.3  | 88.6  | 85.4  | 82.6  | 80.4  | 78.6  | 76.6  | 74.6  | 73.2  | 71.7  | 70.7 | 69.8 | 69.0 |

\* Gray collored cells are values in the best fit model among the 30 Cox PH models from 100-meter to 3000-meter radius models.
